# Supplementary material for: Genomic Diversity of Torque Teno Virus in Blood Samples from Febrile Paediatric Outpatients in Tanzania: A Descriptive Cohort Study
Source: MDPI journal article supplement (doi:10.3390/v14081612), 2022-07-23
Supplement: s1 [file s1]

**Figure S1: Number of TTV species detected by mNGS for each patient.** Median is reported (black bar).

**Figure S2: Linear regression analysis of the number of TTV reads and the age of the patients (month).** Each black dot represents one TTV positive patient.

**Figure S3: Maximum likelihood phylogenetic tree of TTV using the ORF1 nucleotide sequences.** Each phylogenetic group is shown individually. Non-human primate TTV genotypes/species are specifically notified.

**Figure S4: Distribution of the number of reads for each TTV genotype.** Median is reported (black bar).

**Figure S5: Age distribution of TTV genotypes.** Median is reported (black bar).

**Figure S6: Relative abundances of TTV genotypes.** Median is reported (black bar).

**Table S1: patient's dataset**

**Table S2: Database complete Alphatorquevirus genotypes.** For each TTV genotype in our database the corresponding GenBank accession number is provided.

**Table S3: Number of reads detected for each TTV genotype per sample.**
